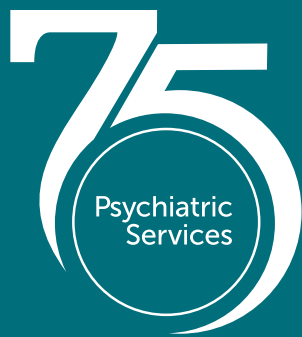

# Psychiatric Services

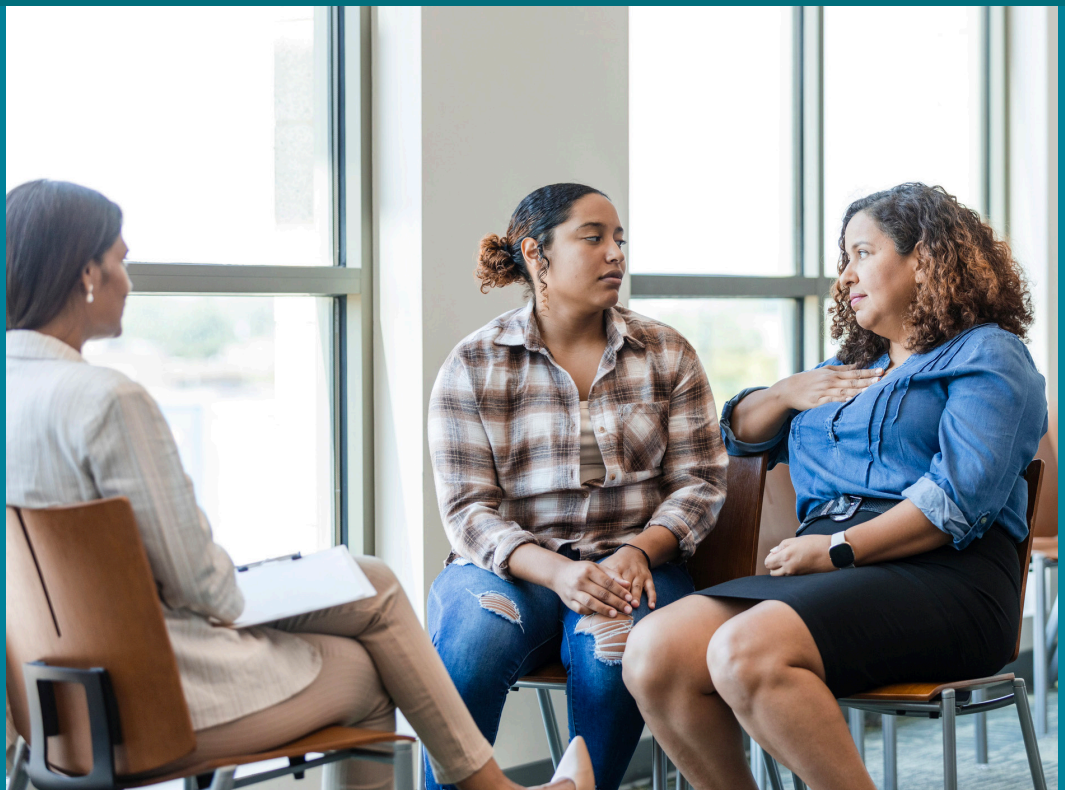

Supporting peer workers and their supervisors

Racial-ethnic differences in ADHD diagnoses of adolescents

Federal workforce planning: psychiatric advanced practice nurses

Controversies: The value and potential of mental health apps
